# Supplementary material for: Oncogenic transgelin-2 is differentially regulated in isocitrate dehydrogenase wild-type vs. mutant gliomas
Source: PubMed Central journal article supplement (PMC6324682; doi:10.18632/oncotarget.26365), 2018-12-14
Supplement: oncotarget-09-37097-s001.pdf [file oncotarget-09-37097-s001.pdf]

## Oncogenic *transgelin-2* is differentially regulated in *isocitrate dehydrogenase* wild-type vs. mutant gliomas

### SUPPLEMENTARY MATERIALS

| Peptide Sequence | Protein | Fold Change<br>IDH WT/Mutant | P-Value               | FDR  |
|------------------|---------|------------------------------|-----------------------|------|
| NFSDNQLQEGK      | TAGLN2  | 2.32                         | 1.49x10 <sup>-3</sup> | 0.49 |
| GASQAGMTGYGMPR   | TAGLN2  | 1.93                         | 9.01x10 <sup>-3</sup> | 0.67 |
| TLMNLGGLAVAR     | TAGLN2  | 1.94                         | 1.65x10 <sup>-2</sup> | 0.75 |

**Supplementary Figure 1: Proteomics analysis of an institutional validation LGG cohort (7 IDH1/2 WT vs. 23 IDH1/2 mutant) identified 36 differentially regulated proteins in common with our discovery cohort (p<0.05).** TAGLN2 was among the 36 differentially regulated proteins. Three peptides corresponding to TAGLN2 were significantly up-regulated in *IDH1/2* WT compared to *IDH1/2* mutant gliomas.

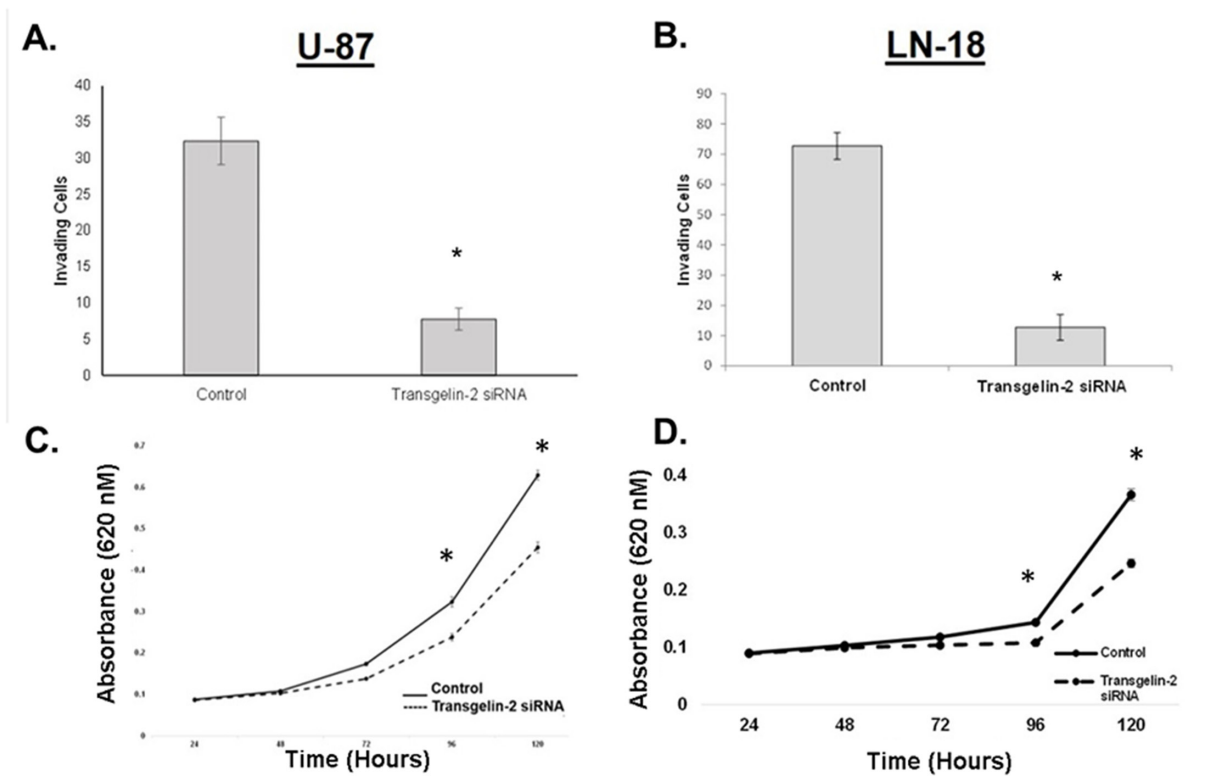

**Supplementary Figure 2: Silencing of TAGLN2 in IDH1/2 WT glioma cells resulted in decreased invasion and proliferation.** *TAGLN2* levels were transiently knocked-down with *TAGLN2* siRNA in U87 MG and LN18 glioma cells. (A and B) Invasion was significantly decreased 24 hours after TAGLN2 knock-down ( $p < 0.05$ ). (C and D) Cell proliferation detected by methylene blue assay was significantly decreased 96 and 120 hours after TAGLN2 knock-down ( $p < 0.05$ ).
